# Supplementary material for: Organotrialkoxysilane-Functionalized Noble Metal Monometallic, Bimetallic, and Trimetallic Nanoparticle Mediated Non-Enzymatic Sensing of Glucose by Resonance Rayleigh Scattering
Source: MDPI journal article supplement (doi:10.3390/bios11040122), 2021-04-15
Supplement: s1 [file s1]

# Organotrialkoxysilane-Functionalized Noble Metal Monometallic, Bimetallic and Trimetallic Nanoparticle Mediated Non-Enzymatic Sensing of Glucose by Resonance Rayleigh Scattering

P C Pandey<sup>1\*</sup>, Murli Dhar Mitra<sup>2</sup>, Shubhangi Shukla<sup>3</sup>, and Roger J Narayan<sup>4\*</sup>

Supporting Information

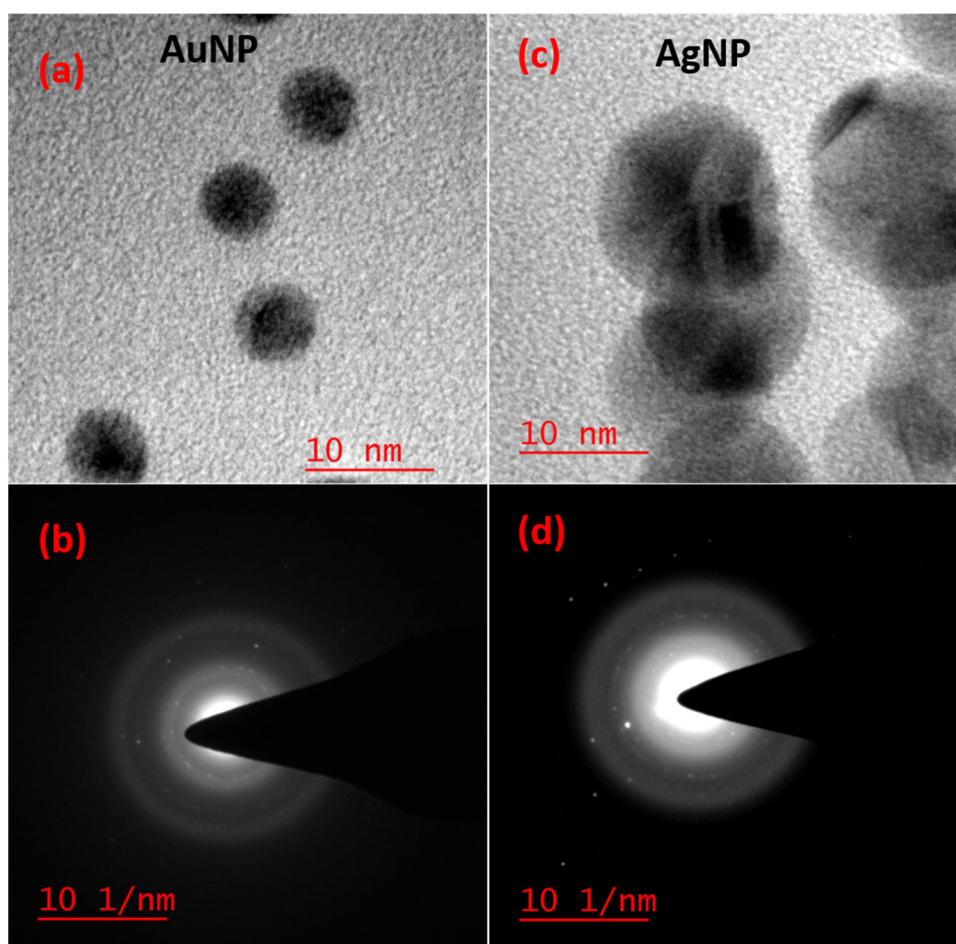

**S1.** TEM images (a) and (c) of the AuNPs and AgNPs, respectively. Selected area electron diffraction patterns (b) and (d) of the AuNPs and AgNPs, respectively.

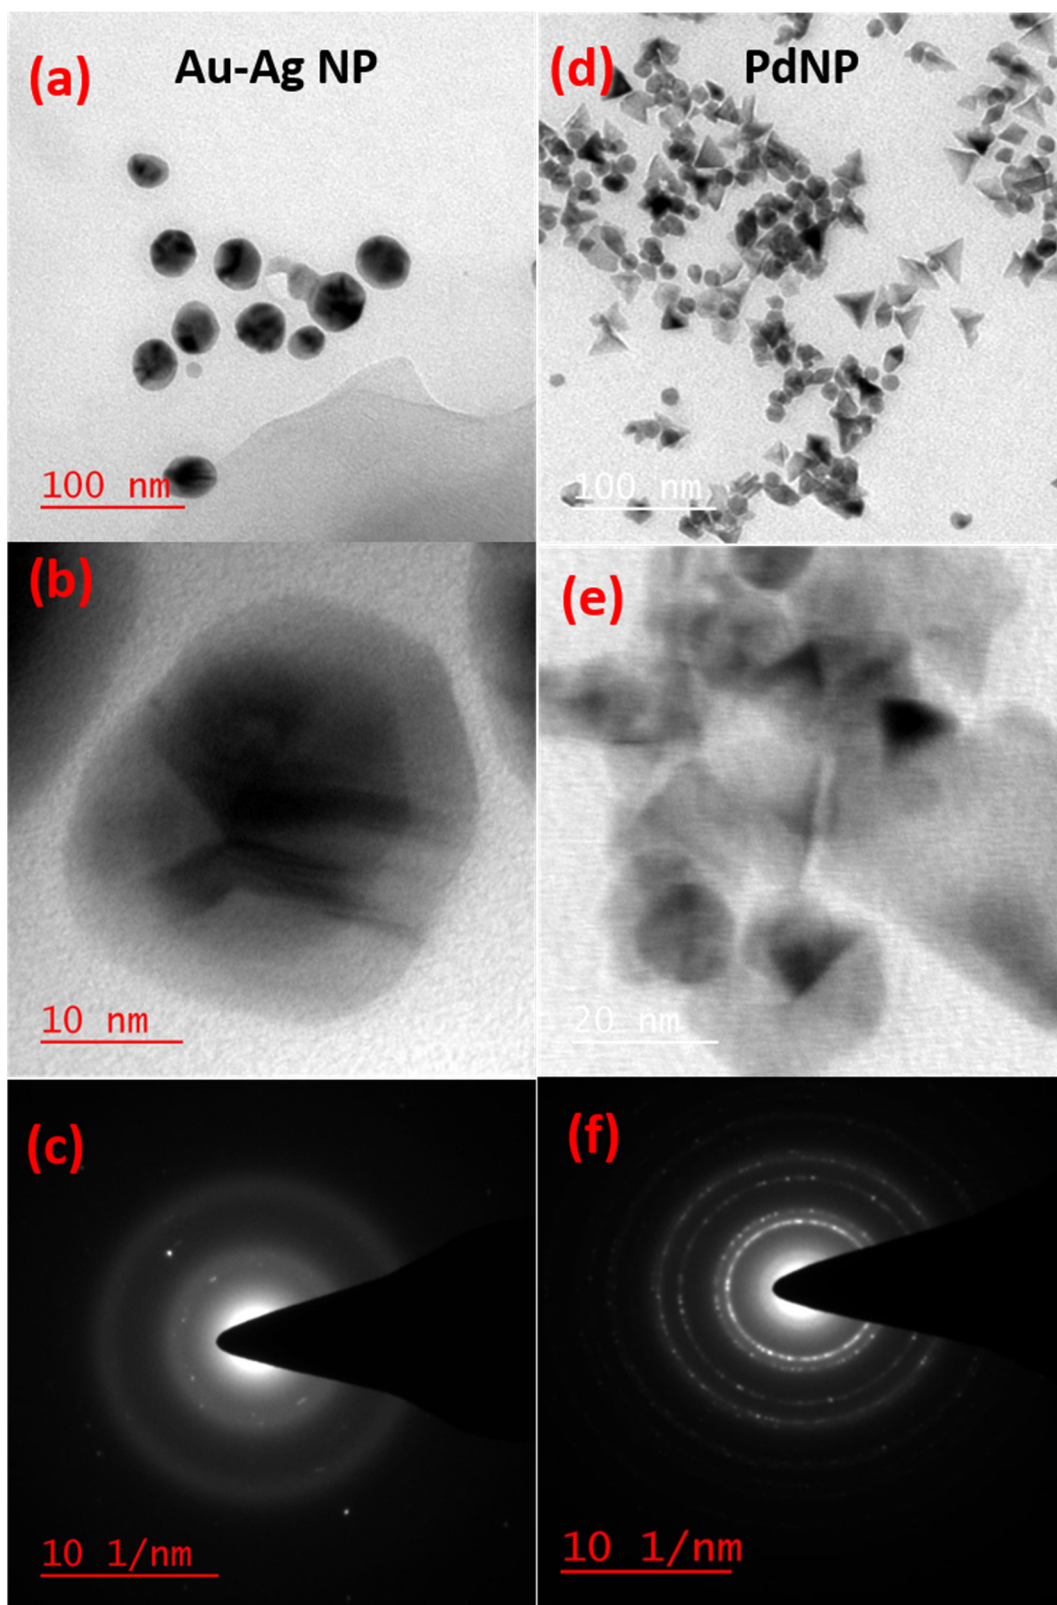

**S2.** TEM images (a)-(b) and corresponding SAED patterns of the bimetallic (Au-Ag) NPs (c). TEM images (d)-(e) and corresponding SAED patterns of the PdNPs (f).

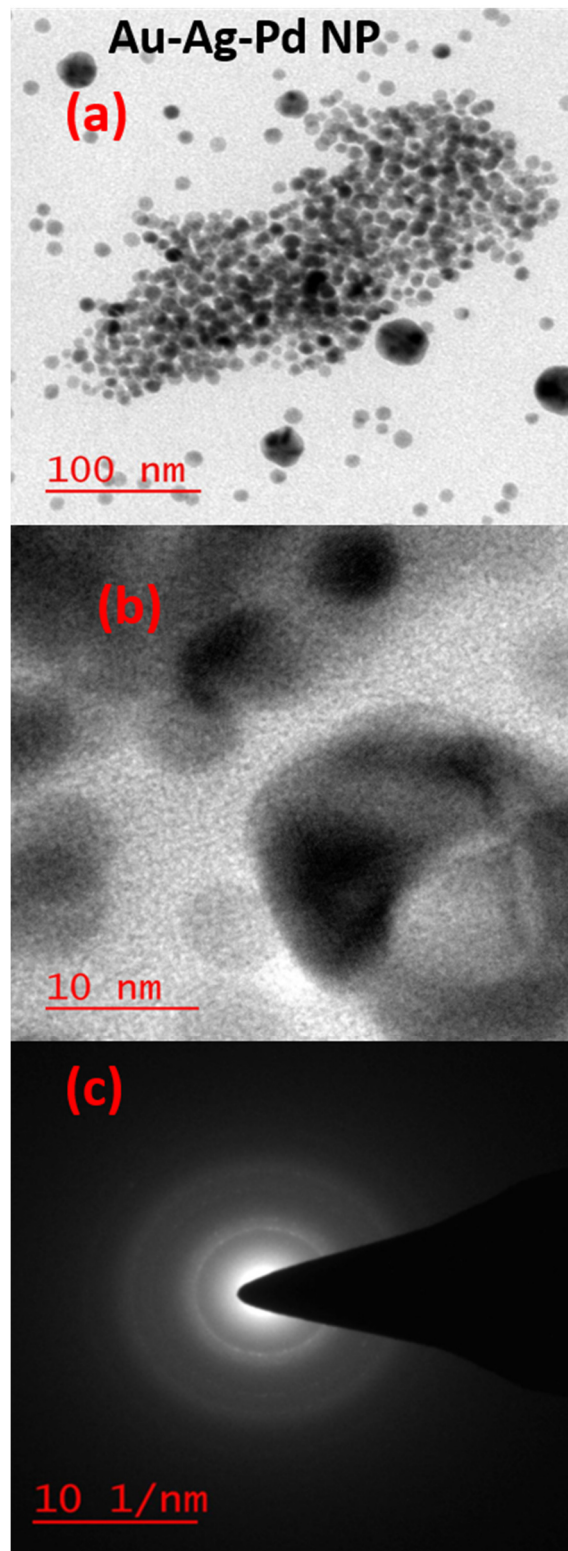

**S3.** TEM images (a)-(b) and corresponding SAED pattern of the trimetallic (Au-Ag-Pd) NPs (c).

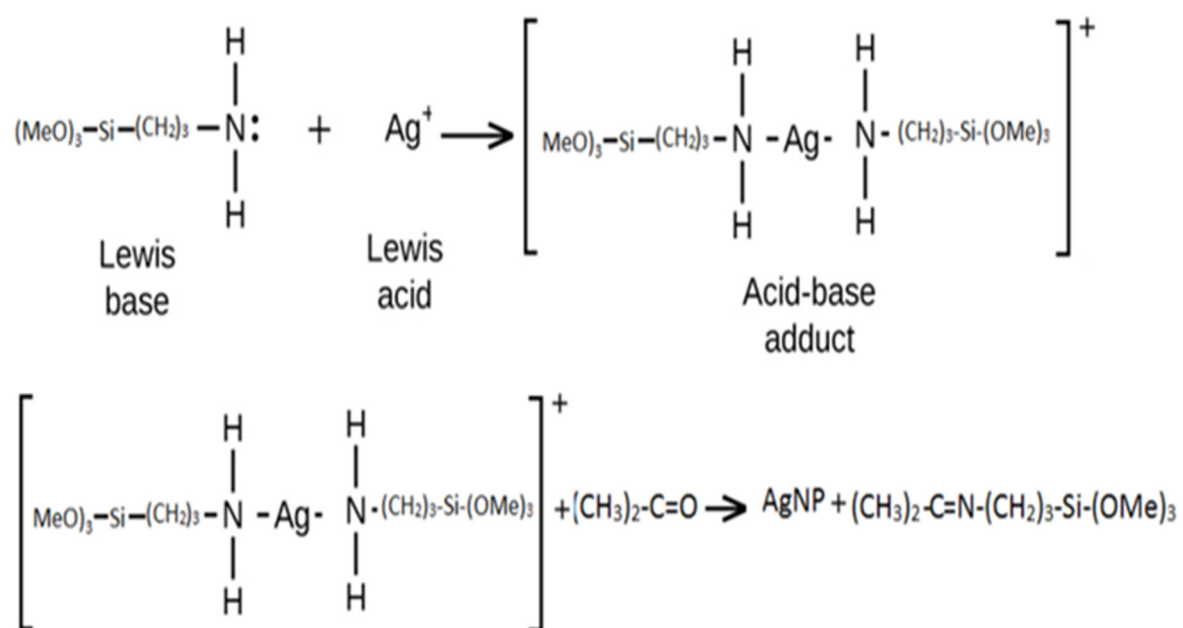

**S4.** Acid-base adduct mediated reduction of noble metal cations.
